# Supplementary material for: Pyrethroids in an AlphaFold2 Model of the Insect Sodium Channel
Source: MDPI journal article supplement (doi:10.3390/insects13080745), 2022-08-18
Supplement: s1 [file s1]

# Supplemental Figures

## Pyrethroids in the AlphaFold2 Model of Insect Sodium Channel

Boris S. Zhorov<sup>1,2</sup> and Ke Dong<sup>3</sup>

<sup>1</sup>Department of Biochemistry and Biomedical Sciences, McMaster University, Hamilton L8S 4K1 Canada;

<sup>2</sup> Sechenov Institute of Evolutionary Physiology & Biochemistry, Russian Academy of Sciences, St. Petersburg, 194223

<sup>3</sup> Department of Biology, Duke University, Durham, NC 27708, U.S.A.

| Segment    | #    | k1<br>      | k11<br>    | o1<br>     | o11<br>    | o21<br>  |
|------------|------|-------------|------------|------------|------------|----------|
| I L45-S5   | 243  | VPGLKTIVGA  | VI         | ESVKNLRDVI | ILTMFSLSVF | ALMGLQIY |
| II L45-S5  | 908  | WPTLNLLISI  | MG         | RTMGALGNLT | FVLCIIIFIF | AVMGMQLF |
| III L45-S5 | 1401 | MQGMRVVVNA  | LV         | QAIPSIENVL | LVCLIFWLIF | AIMGVQLF |
| IV L45-S5  | 1719 | AKGIRTLLEFA | LA         | MSLPALFNIC | LLLFLVMFIF | AIFGMSFF |
|            |      |             |            |            |            |          |
|            |      | p37<br>     | p41<br>    | p51<br>    | p61<br>    |          |
| I P        | 363  | GWAF        | LSAFRLMTQD | YW_ENLYQLV | LRS        |          |
| II P       | 972  | MHSF        | MIVFRVLCGE | _WIESMWDCM | LVG        |          |
| III P      | 1484 | GKAY        | LCLFQVATFK | GW_IQIMNDA | IDS        |          |
| IV P       | 1777 | GQSM        | ILLFQMSTSA | GW_DGVLDGI | INE        |          |
|            |      |             |            |            |            |          |
|            |      | i1<br>      | i11<br>    | i21<br>    |            |          |
| I S6       | 392  | PWHMLFFIVI  | IFLGsfYLVN | LILAIVAMSY |            |          |
| II S6      | 999  | VSCIPFFLAT  | VVIGNLVVLN | LFLALLSNF  |            |          |
| III S6     | 1522 | IYMYLYFVFF  | IIFGSFFTLN | LFIGVIIDNF |            |          |
| IV S6      | 1822 | TIGITYLLAY  | LVISFLIVIN | MYIAVILENY |            |          |

**Figure S1. Sequence alignment of linker-helices L45 (S4-S5), outer helices S5, P-loops and inner helices S6 in repeats I-IV of the AaNav1-1 channel.** Top rows above the sequences show residue labels, which are universal for P-loop channels. Column “#” shows the housefly number for the leftmost residue in the row.

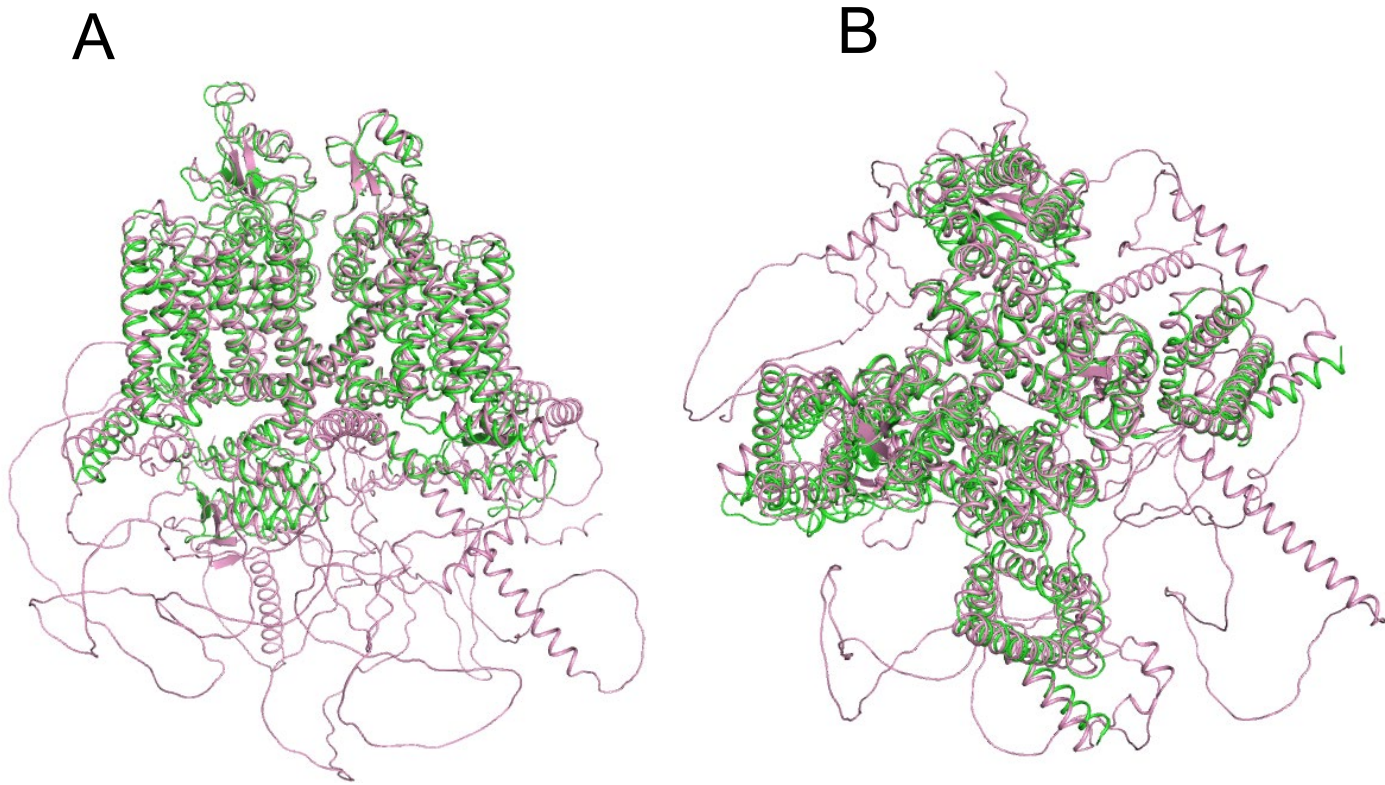

**Figure S2.** Intra-membrane (**A**) and extracellular (**B**) views at the cryo-EM structure of cockroach non-functional sodium channel NavPaS (green, PDB ID: 5X0M) and the AlphaFold2 model of the mosquito sodium channel AaNav1-1 (magenta). The structures were superimposed by minimizing RMS deviations of the four P1 helices, which are the most structurally conserved segments of P-loop channels against the crystal structure of Kv1.2/Kv2.1 channel (PDB ID: 2R9R). Folding of extracellular and transmembrane segments is very similar. The AF2 model has several structured segments that are not resolved in the cryo-EM structure of NavPaS or other eukaryotic sodium channels.

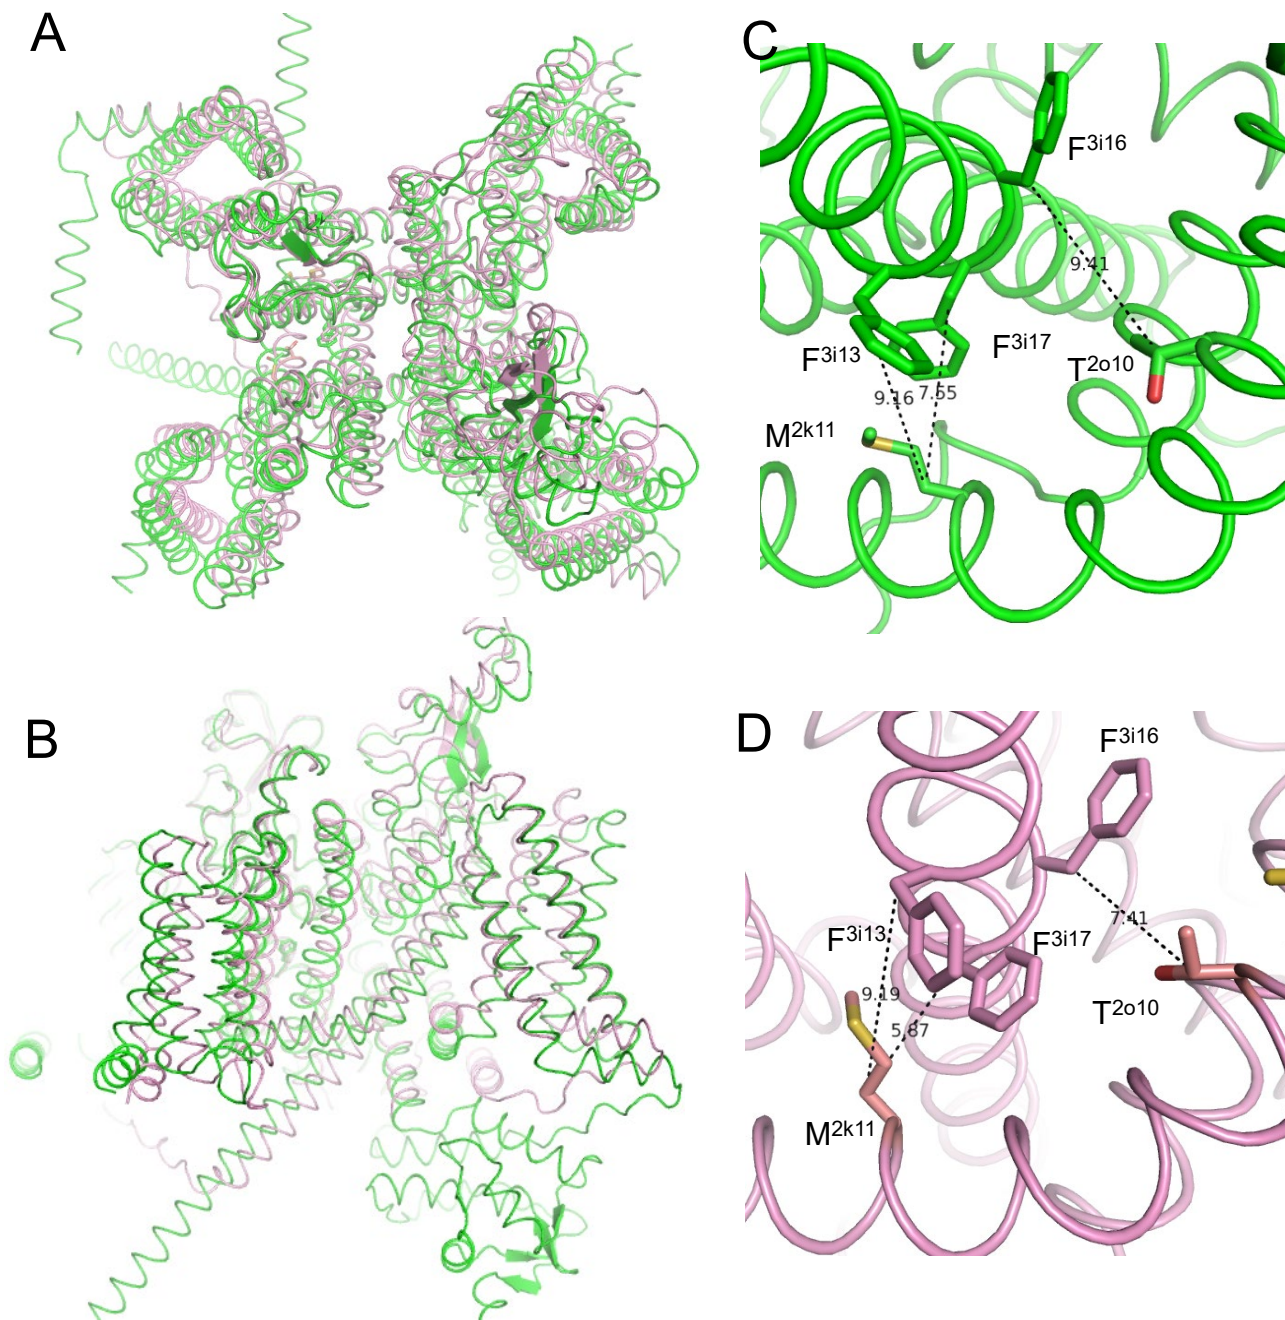

**Figure S3.** AlphaFold2 (green) and RoseTTAFold (pink) models of the AaNav1-1 channel 3D-aligned with Chimera-X (Pettersen et al., 2021). In the AF2 model unstructured cytoplasmic loops are removed. In the RoseTTAFold model (Baek et al., 2021), the N-terminal part and C-terminal domain are removed and large cytoplasmic linkers are replaced with 20-residue glycine linkers to satisfy the size limitation of the Robetta Server (<http://robetta.bakerlab.org>) and preserve a single-subunit sequence of the model. Despite the different size of the models, the overall folding of the transmembrane and extracellular parts is rather similar. **A, B.** Extracellular and intermembrane views. **C, D.** Enlarged views of the PyR1 site in the models. Distances between CB atoms of pyrethroid-sensing residues in the AF2 model is larger than in the RoseTTAFold model.



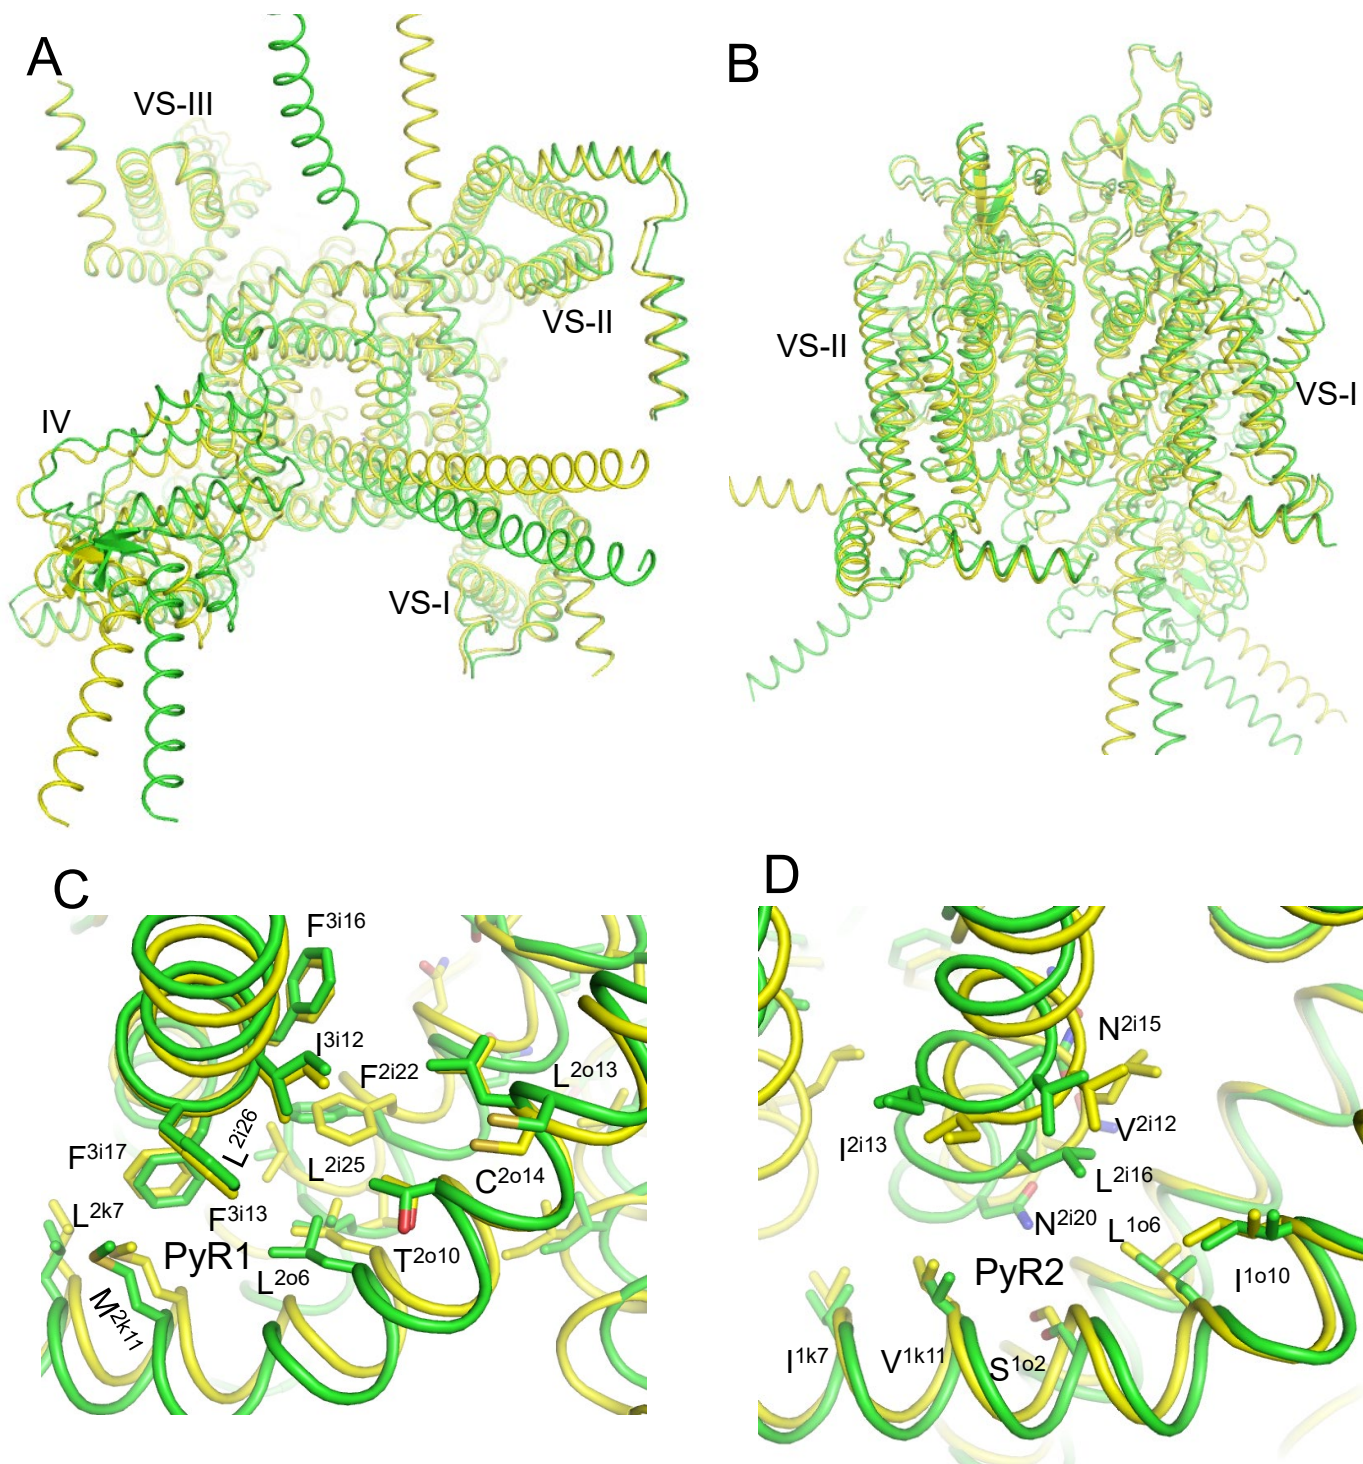

**Figure S4** The AF2 model of the channel with inactivated PD (*i*AaNav1-1, yellow) overlaid over the channel model with *in-silico* opened PD (*i*AaNav1-1, green). **A, B.** Extracellular and intermembrane views. **C, D.** Enlarged views of the PyR1 and PyR2 sites in the models. Note a large shift of helix IIS6 in which several residues contribute to the PyR2 site.

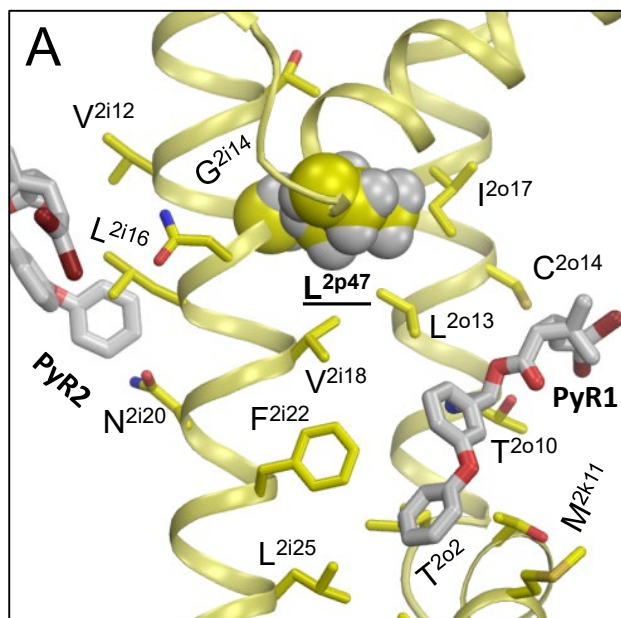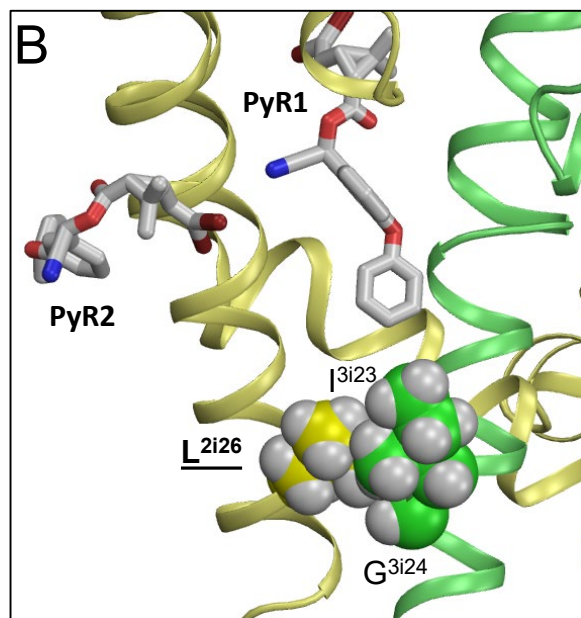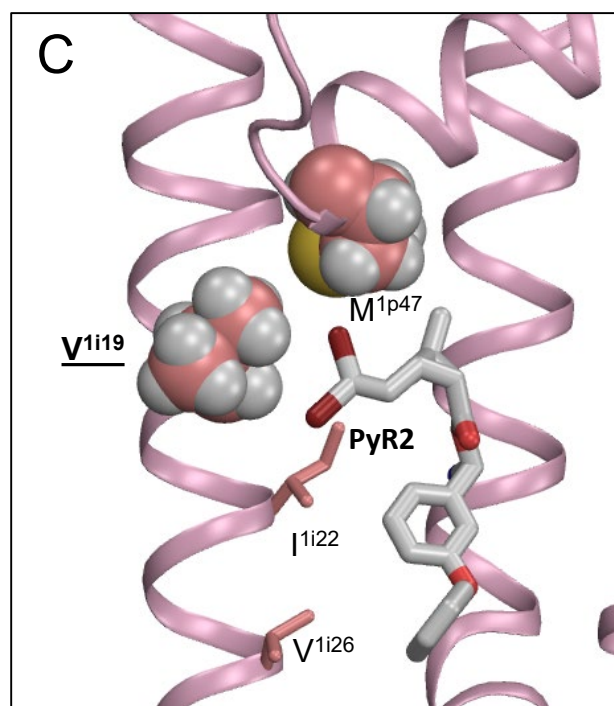

**Figure S5.** Intersegment contacts of residues in the PyR1 site whose kdr mutations may exert dual impact on the action of pyrethroids (see Section 3.11 for mode detail).
